# Supplementary material for: Freeze-crosslinking approach for preparing carboxymethyl cellulose nanofiber/zirconium hydrogels as fluoride adsorbents
Source: Royal Society of Chemistry journal article supplement (doi:10.1039/d4nr01572j), 2024-01-01
Supplement: d4nr01572j1.pdf [file d4nr01572j1.pdf]

1 Supplementary

2 **Freeze-crosslinking approach for preparing carboxymethyl cellulose**

3 **nanofiber/zirconium hydrogels as fluoride adsorbents**

4 Yurina Sekine,<sup>\*a</sup> Takuya Nankawa,<sup>b</sup> Tsuyoshi Sugita,<sup>a</sup> Yoshiyasu Nagakawa,<sup>c</sup> Yuki Shibayama,<sup>a</sup>

5 Ryuhei Motokawa,<sup>a</sup> and Tomoko Ikeda-Fukazawa<sup>d</sup>

6 <sup>a</sup>Materials Sciences Research Center, Japan Atomic Energy Agency (JAEA), Tokai, Ibaraki 319-

7 1195, Japan. <sup>b</sup>Promotion Office, JAEA, Tokai, Ibaraki 319-1195, Japan. <sup>c</sup>Tokyo Metropolitan

8 Industrial Technology Research Institute, Aomi, Koto-ku, Tokyo 135-0064, Japan. <sup>d</sup>School of

9 Science and Technology, Meiji University, Kawasaki, Kanagawa 214-8571, Japan.

10 \*Corresponding author: Yurina Sekine

11 Materials Sciences Research Center, Japan Atomic Energy Agency, 2-4 Shirakata, Tokai,

12 Ibaraki 319-1195, Japan.

13 Email: [sekine.yurina@jaea.go.jp](mailto:sekine.yurina@jaea.go.jp)

14

15

## 16 **Characterization**

17 The compressive strengths of the samples were measured on a texture analyser (TA.XTplus,  
18 Stable Micro Systems Co. Ltd., UK). The swollen under wet conditions were compressed to a  
19 strain of 0.8 with a cylindrical probe (20 mm diameter) at a speed of  $1 \text{ mm s}^{-1}$ . The Young's  
20 moduli were calculated from the slopes of the stress–strain curves in the linear region (0.01–  
21 0.05 strain). For TG tests, approximately 4 mg of sample was heated in an open aluminium pan  
22 to 413 K (rate of 10 K/min). For BET tests, the samples were degassed at 333 K under reduced  
23 pressure for 5 hours prior to each measurement. For SANS analysis, the scattering intensities  
24 from the sample cell and the solvent were subtracted by using measured transmission and the  
25 volume fraction of the solvent. Samples for the SANS experiments were prepared using  $\text{D}_2\text{O}$  as  
26 solvent.

27

28

29

30

31

32

33

34

35

36

37

38 **Figure S1.** Optical microscopy images of CMF before and after freezing.

39

40

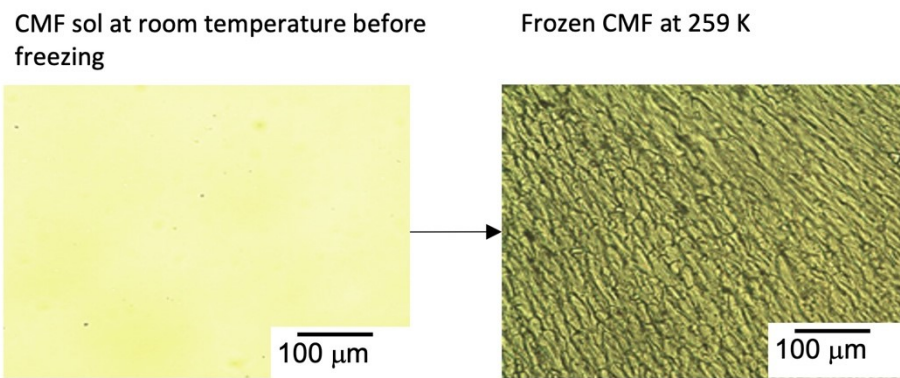

41

42

43

44

45

46

47

48

49

50

51 **Figure S2.** Photographs of the CMF-F and CMF-F-Zx (x = 0.1, 0.5, or 1).

52

53

54

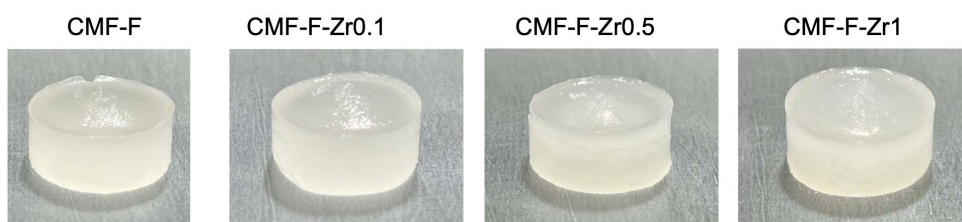

55

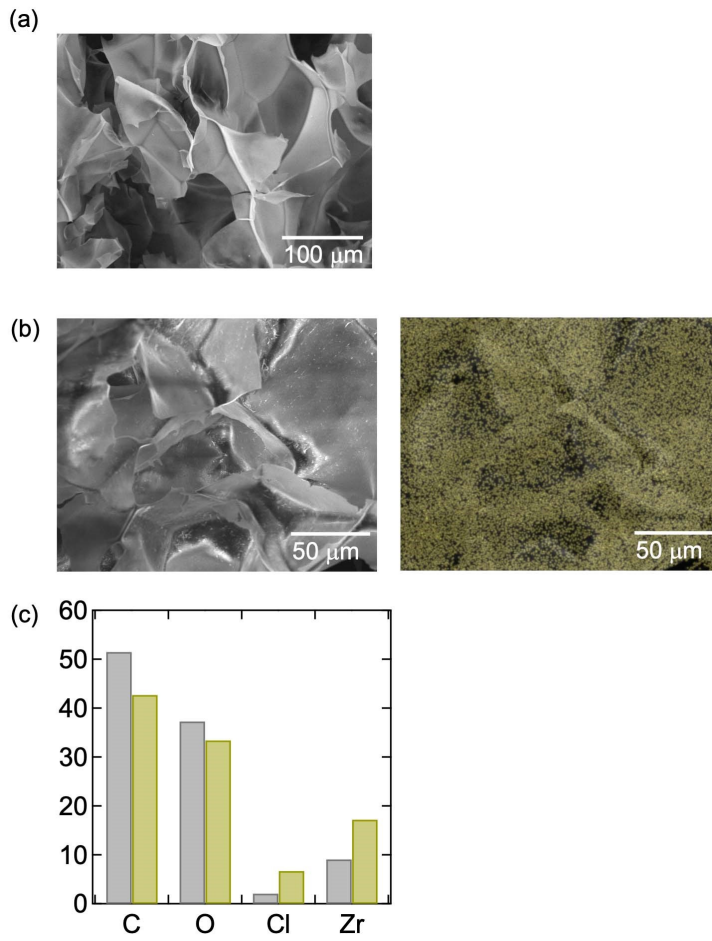

56

57

58

59 **Figure S3.** (a) SEM images of freeze-dried CMF-F. (b) SEM-EDX images for CMF-F-Z3. The yellow color  
60 represents Zr. (c) The relative ratios of C, O, Cl, Zr in CMF-F-Z0.5 (gray) and CMF-F-Z3 (yellow)  
61 estimated from SEM-EDX results.

62

63

64

65

66

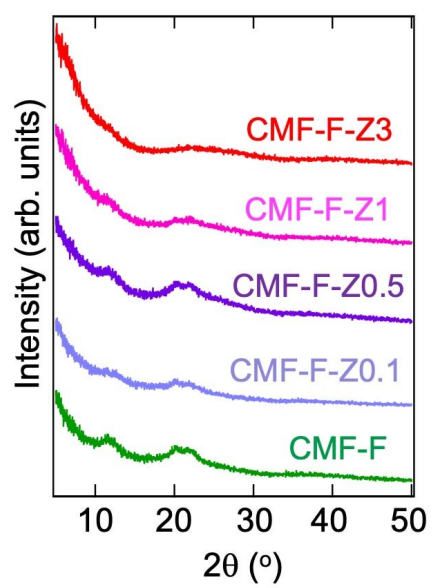

67

68 **Figure S4.** PXRD patterns of freeze-dried CMF-F and CMF-F-Z<sub>x</sub> (x = 0.1, 0.5, 1, or 3).

69

70

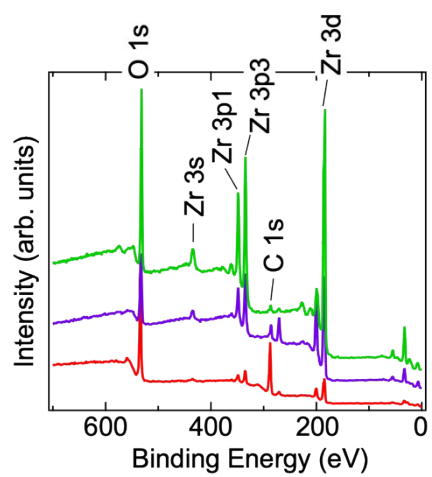

71

72

73

74 **Figure S5.** XPS survey scans of CMF-F-Z3 (red), ZrCl<sub>2</sub>O·8H<sub>2</sub>O (purple), ZrO<sub>2</sub> (green).

75

76  
77  
78  
79  
80  
81  
82  
83  
84  
85  
86  
87  
88  
89  
90  
91

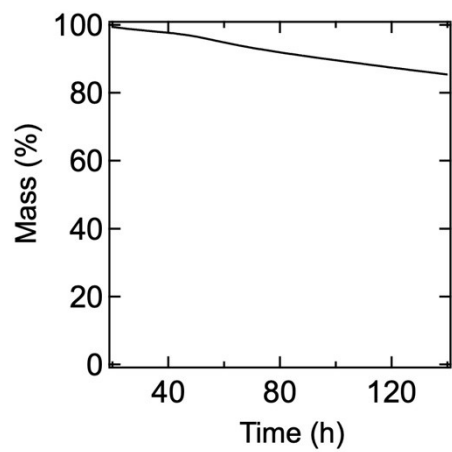

**Figure S6.** TG curve of freeze-dried CNF-F-Z3 hydrogel.



92

93 **Table S1** Langmuir isotherm fitting parameters for the adsorption of fluoride on CMF-F-Z3.

94 The equation is as  $Q_e \text{ (mg g}^{-1}\text{)} = (b \times Q_{max} \times C_e)/(1 + b \times C_e)$ , where  $b \text{ (L mg}^{-1}\text{)}$  is a

95 constant related to the free energy of adsorption,  $C_e \text{ (mg L}^{-1}\text{)}$  is the equilibrium

96 concentration of fluoride in the solution,  $Q_e \text{ (mg g}^{-1}\text{)}$  is the amount of fluoride

97 adsorbed per unit weight of CMF-F-Z3, and  $Q_{max} \text{ (mg g}^{-1}\text{)}$  is the maximum adsorption

98 capacity.

| Material        | Langmuir isotherm model              |                                |        |
|-----------------|--------------------------------------|--------------------------------|--------|
|                 | $Q_{max} \text{ (mg g}^{-1}\text{)}$ | $b \text{ (L mg}^{-1}\text{)}$ | R      |
| <b>CNF-F-Z3</b> | 24.1                                 | 0.0462808                      | 0.9957 |

99

100
